# Supplementary material
Source: Springer Nature journal article supplement (https://www.springermedizin.de/resource/supplementary/12865_2009_271_MOESM2_ESM.pdf/9427650)

A)

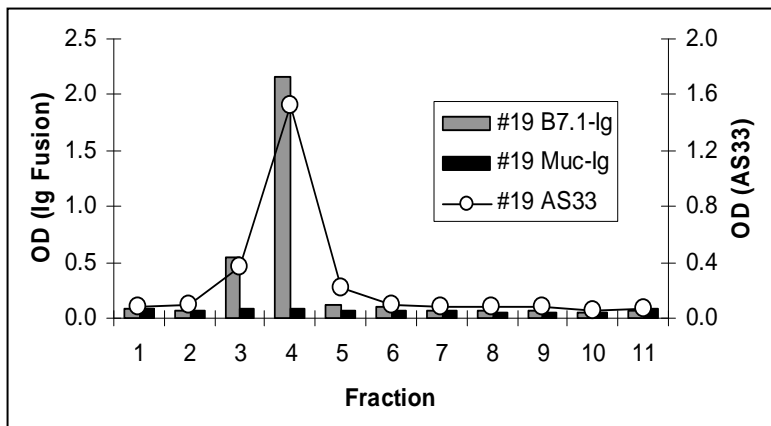

B)

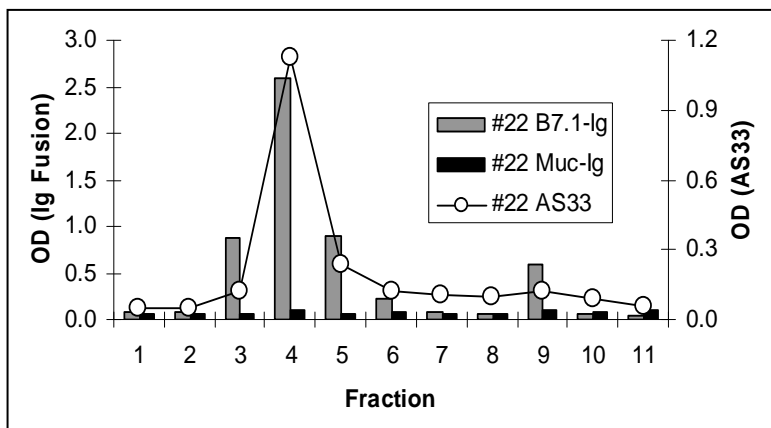

C)

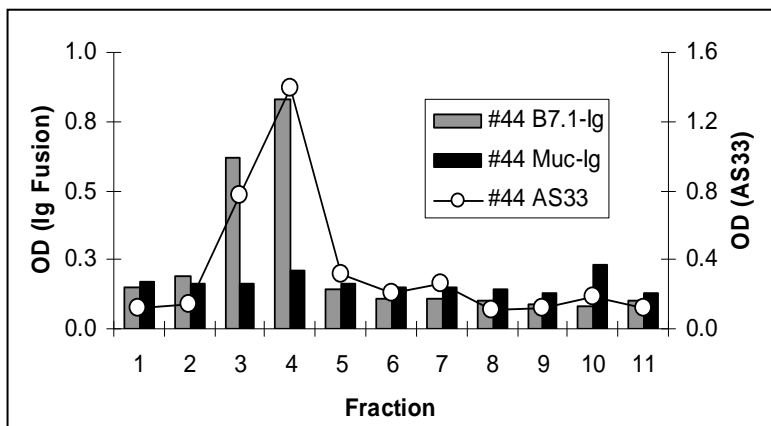

Supplement: MOESM2 [file 9427650]
